# Supplementary material
Source: PubMed Central journal article supplement (PMC5717407)
Supplement: cr2017144x2.pdf [file cr2017144x2.pdf]

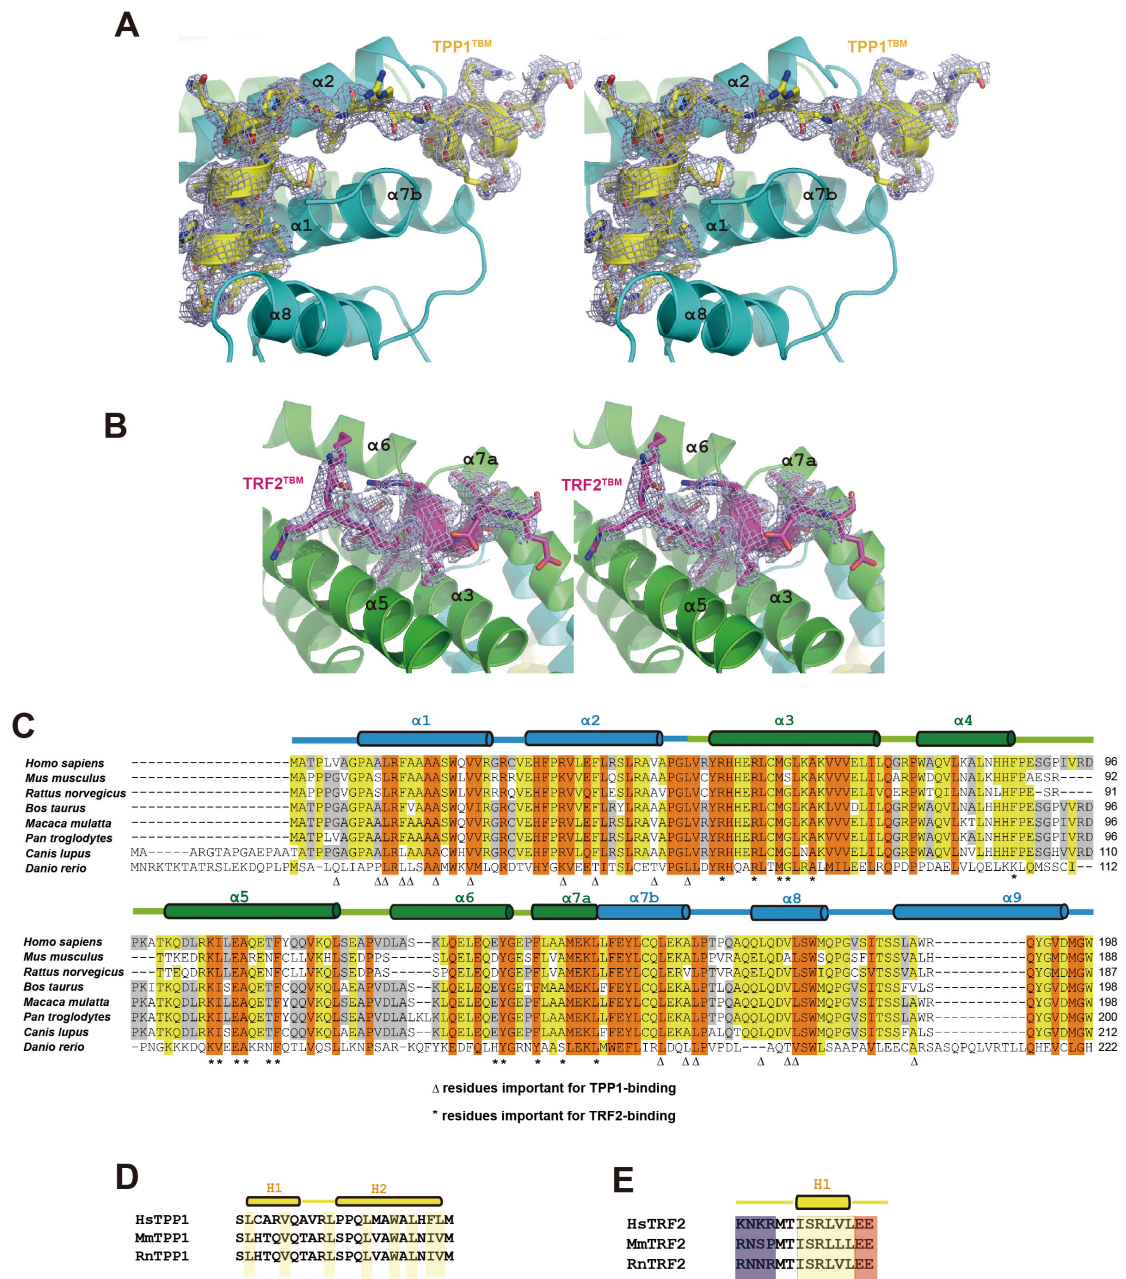

**Supplementary Figure 2. The crystal structure of TIN2<sub>TRFH</sub>-TPP1<sub>TBM</sub>-TRF2<sub>TBM</sub> complex. A.** The TPP1<sub>TBM</sub>-binding-pocket in TIN2<sub>TRFH</sub> shown as stereo images. TIN2 is colored in cyan and TPP1 is colored in yellow. The electron density (2Fo-Fc) map, contoured at 1 $\delta$ , is shown for TPP1<sub>TBM</sub>. Right panel shows TRF2 binding pocket of TIN2<sub>TRFH</sub>. **B.** The TRF2<sub>TBM</sub>-binding-pocket in TIN2<sub>TRFH</sub>. TIN2 is colored in green and TRF2 is colored in magenta. The electron density (2Fo-Fc) map, contoured at 1 $\delta$ , is shown for TRF2<sub>TBM</sub>. **C.** Sequence alignment of TIN2 proteins from different species. Secondary structure assignments based on the hTIN2 structure are shown as cylinders ( $\alpha$ -helices) and lines (loops) above the sequences. The residues important for TPP1- and TRF2-binding are labeled as indicated. **D.** Sequence alignment of TIN2-binding motifs of TPP1 from human, mouse and rat. **E.** Sequence alignment of TIN2-binding motifs of TRF2 from human, mouse and rat.
