# Supplementary material
Source: PubMed Central journal article supplement (PMC5717407)
Supplement: cr2017144x3.pdf [file cr2017144x3.pdf]

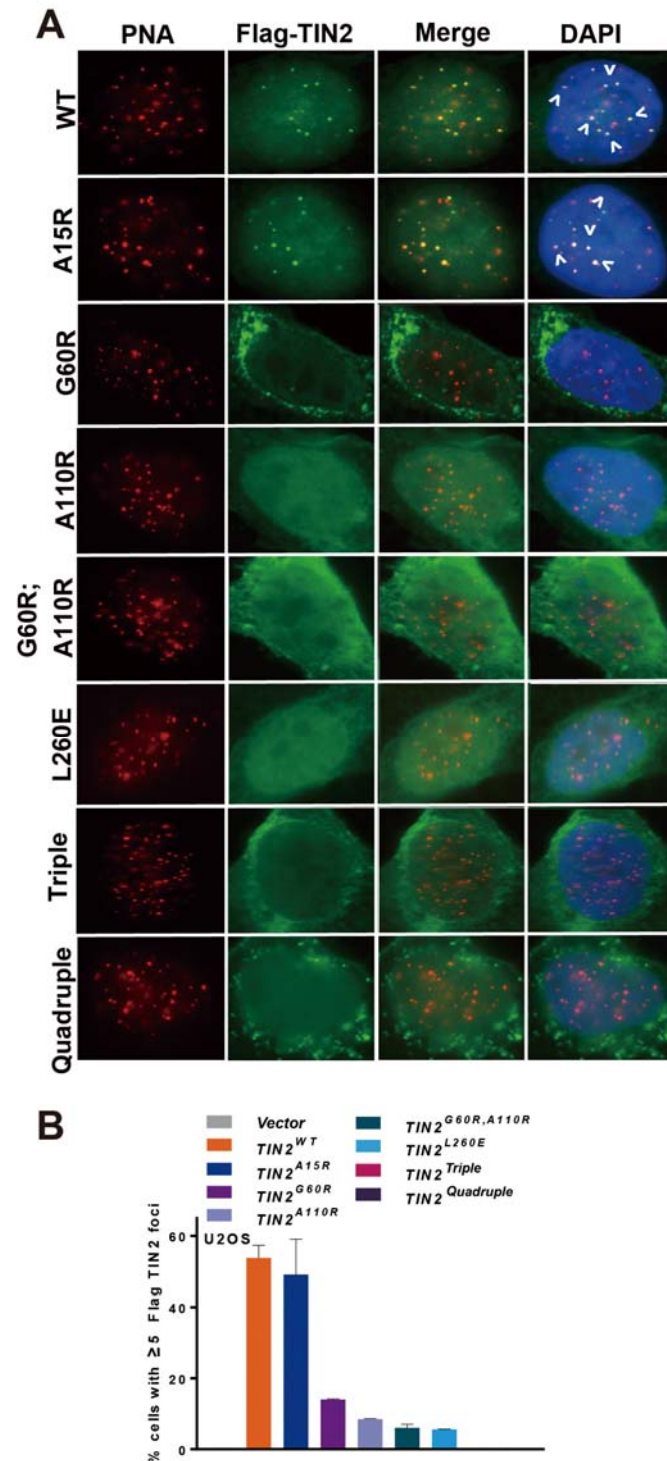

**Supplementary Figure 3. Analyses of TIN2 localization in U2OS cells. A.** Indicated WT or hTIN2 mutants were transiently overexpressed in U2OS cells. Telomeres were visualized with telomere PNA-FISH (red), anti-Flag antibody to visualize hTIN2 (green) and DAPI staining to visualize nuclei (blue). **B.** Quantification of the percent of cells with  $\geq 5$  Flag WT hTIN2 and the mutants on telomeres in (A). Error bar (SEM) was derived from three repeated experiments. A minimum of 150 nuclei was scored per experiment and three independent experiments were performed.
